# Supplementary material
Source: PubMed Central journal article supplement (PMC2784731)

**Supplementary Figure Legends:**

**Figure S1. Gβγ Enhances GDP-Gas Binding to 5NT in the Presence and Absence of Aluminum Fluoride.** GST or GST-tagged 5NT (2 μM final) was incubated with G-protein subunits, GDP-Gas and/or Gβ1γ2 (1 μM). GST pull-down assay was performed in the presence or absence of AlF<sub>4</sub> (n=2). When present, 30 μM aluminum and 10 mM fluoride was present in all incubation and wash buffers.

**Figure S2. Gel Filtration Analysis of Complex Formation between 5NT 60-129 and Gas·βγ.** Proteins (10 μM of each) were applied on a superdex 200 column in buffer containing 0.1% C<sub>12</sub>E<sub>10</sub>, 75 mM NaCl, and 10 μM GDP and fractions (0.3 ml) were analyzed by SDS-PAGE and immunoblotting. Upper panel: complex of 5NT 60-129/Gαs/Gβγ, middle panel: 5NT 60-129 alone, lower panel: Gαs/Gβγ. The 5NT60-129/Gαs/Gβγ complex is boxed while smaller complexes containing 5NT with Gαs or Gβγ are marked with an asterisk (n=2).

**Figure S3. Gβγ and GDP-Gas Bind to 6NT.** GST proteins (2 μM final) were incubated with G-protein subunits, GDP-Gαs or Gβγ and subjected to GST pull-down assay as described in Fig. S1 (n=5).

**Figure S4. The N-terminus of AC5 Does Not Serve As GAP or GEF.** (A), GTPγS filter binding assay was performed as described in (Graziano and Gilman, 1989). Briefly, G-protein subunits, GDP-Gas·βγ (1 μM) in presence or absence of GST or GST-tagged 5NT (10 μM final) were incubated with 100 uM [<sup>35</sup>S]GTPγS (~ 2000 cpm/pmol). Bound [<sup>35</sup>S]GTPγS was detected by binding to nitrocellulose filters in a 96 well format. (B) GTPase assay was performed as

described in (Graziano and Gilman, 1989) with slight modification. Briefly, *G $\alpha$ s* (12.5 pmol) was incubated with GST or GST-tagged 5NT (10  $\mu$ M final). The reaction was started by addition of [ $\gamma$ - $^{32}$ P]GTP (~60000 cpm/pmol). An aliquot was taken at indicated time points and  $^{32}$ Pi was separated using activated charcoal and measured by scintillation counting.

**Figure S5. 5NT and 5NT60-129 Pull Down a 5C1/5C2/GTP $\gamma$ S-*G $\alpha$ s* Complex in the Presence or Absence of Forskolin.** 5C1, 5C2, and GTP $\gamma$ S-*G $\alpha$ s* (1  $\mu$ M each) were incubated in presence or absence of 100  $\mu$ M forskolin for 30 min on ice prior to addition of GST, GST-5NT, or 5NT 60-129 (2  $\mu$ M). GST pull-down assay was performed as described in the Methods section. Western blot analysis of input and eluted proteins is shown (n=2).

**Figure S6. 5NT Has No Effect on C1/C2 Basal AC Activity.** Purified AC5 catalytic domains, 5C1 (70 nM) and 5C2 (1  $\mu$ M), were preincubated with GST or GST-tagged 5NT deletions (5  $\mu$ M) for 10 min prior to start of the assay (n=3).

**Figure S7. Purified 5NT Does Not Alter Full-Length AC5 Activity.** *Sf9* membranes expressing AC5 or AC5 $\Delta$ 66-137 were assayed for basal activity, *Gas*-stimulated activity (50 nM) or forskolin-stimulated activity (50  $\mu$ M) in the presence 5  $\mu$ M GST, 5NT, or 5NT deletions (n=2).

**Figure S8. G $\beta$  $\gamma$  Does Not Enhance 5C1/5C2/5NT Activity. (A),** Purified AC5 catalytic domains, 5C1 (70 nM) and 5C2 (1  $\mu$ M), were preincubated with GST or GST-tagged 5NT in the presence or absence of G $\beta$ 1 $\gamma$ 2 as indicated for 10 min prior to stimulation with 400 nM GTP $\gamma$ S-

G $\alpha$ s (n=3).

**References:**

Graziano MP and Gilman AG (1989) Synthesis in Escherichia coli of GTPase-deficient mutants of Gs alpha. *J Biol Chem* **264**:15475.

**Figure S1**

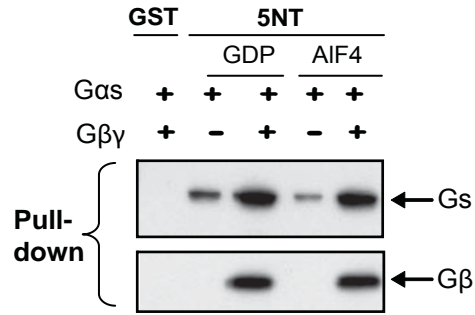

**Figure S2**

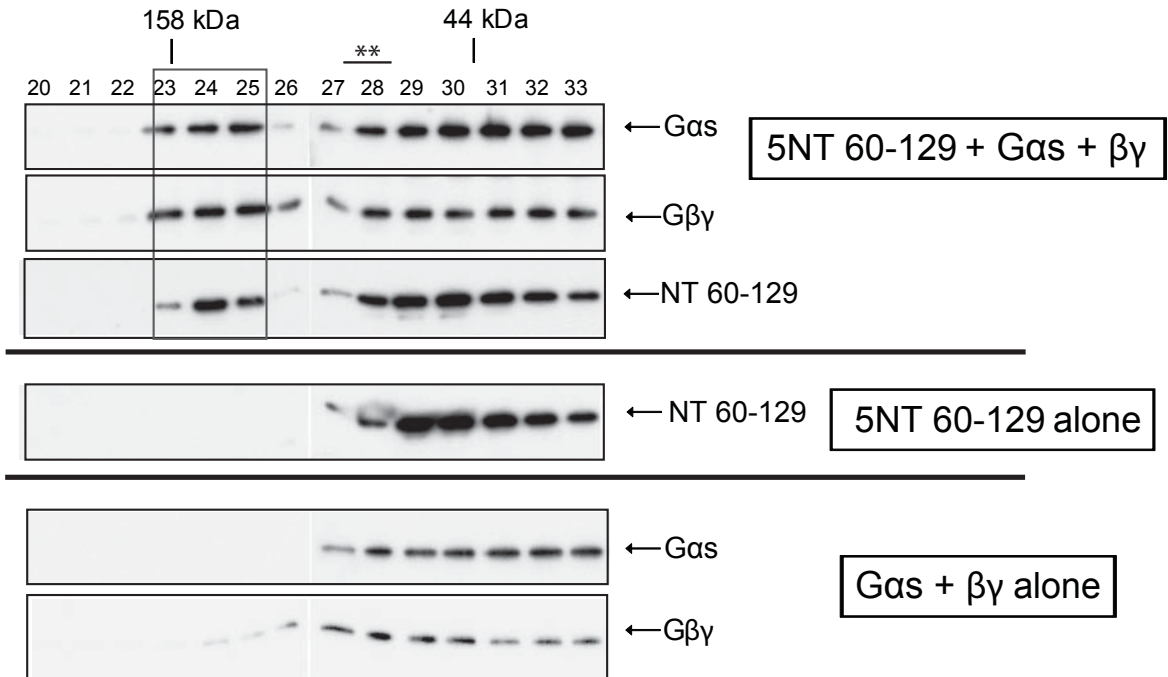

**Figure S3**

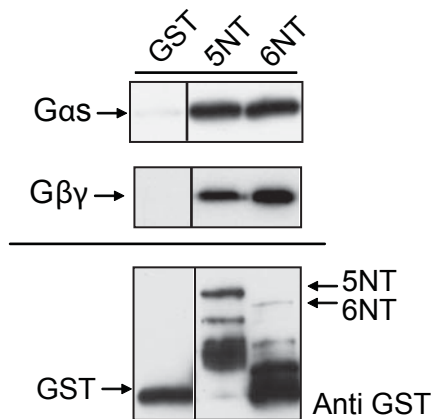

**Figure S4**

**A**

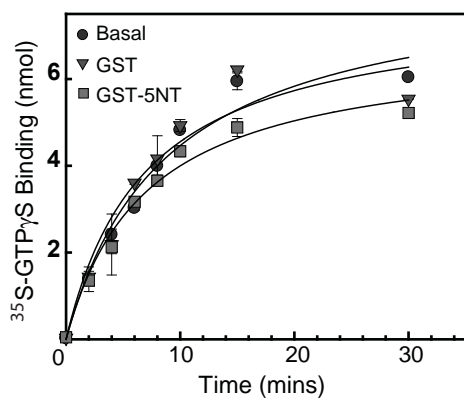

**B**

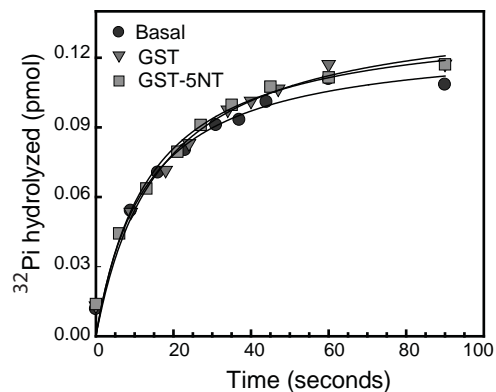

**Figure S5**

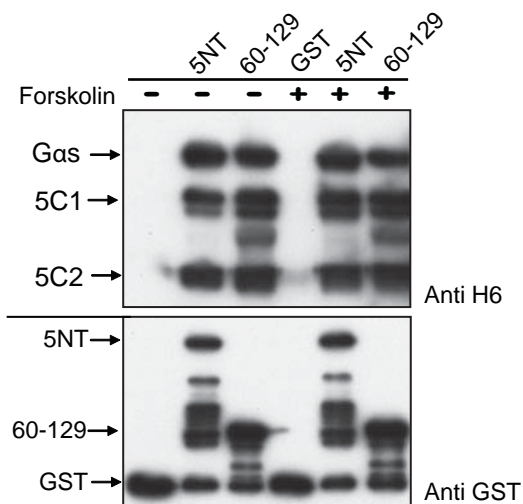

**Figure S6**

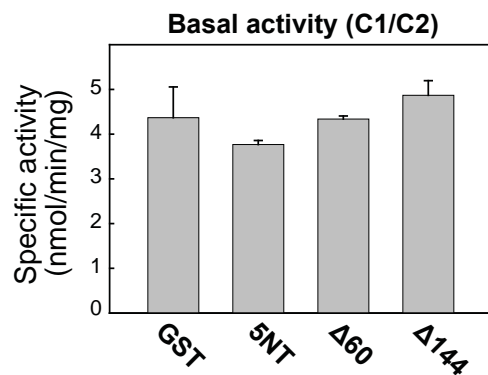

**Figure S7**

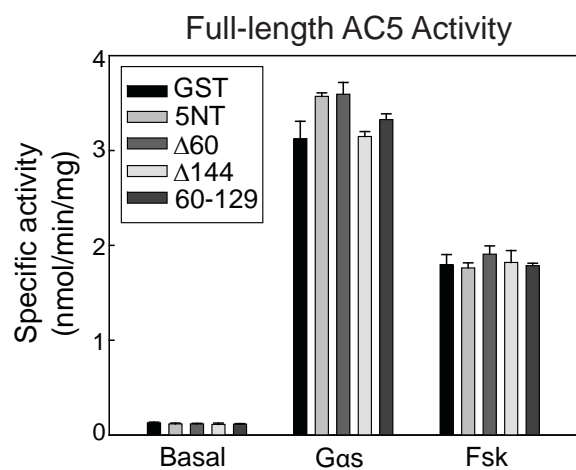

**Figure S8**

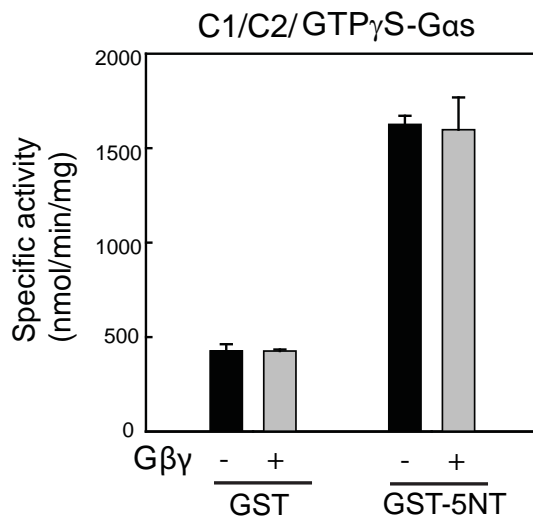

Supplement: supp_mol.109.058370_Figure_Legends_Supplementary_Figures_revised.pdf [file supp_mol.109.058370_Figure_Legends_Supplementary_Figures_revised.pdf]
